# Supplementary material for: Solid-state and solution-phase characterization of SmII-aza[2.2.2]cryptate and its methylated analogue
Source: Royal Society of Chemistry journal article supplement (doi:10.1039/d2dt01823c), 2022-01-01
Supplement: d2dt01823c1.pdf [file d2dt01823c1.pdf]

## Solid-State and Solution-Phase Characterization of Sm<sup>II</sup>-Aza[2.2.2]Cryptate and Its Methylated Analogue

Sergely Steephen Bokouende,<sup>a</sup> Tyler C. Jenks,<sup>a</sup> Cassandra L. Ward,<sup>b</sup> Matthew J. Allen<sup>\*,a</sup>

<sup>a</sup> Department of Chemistry, Wayne State University, 5101 Cass Ave., Detroit, MI 48202, USA  
<sup>b</sup> Lumigen Instrument Center, Wayne State University, 5101 Cass Ave., Detroit, MI 48202, USA  
\*Email: mallen@chem.wayne.edu.

| Page | Contents                                                  |
|------|-----------------------------------------------------------|
| S1   | Table of contents                                         |
| S2   | Experimental procedures                                   |
| S3   | X-ray crystallography data for [Sm1]I                     |
| S5   | X-ray crystallography data for [Sm2]I <sub>2</sub>        |
| S7   | Shape analysis of Sm <sup>II</sup> in [Sm1]I              |
| S7   | Shape analysis of Sm <sup>II</sup> in [Sm2]I <sub>2</sub> |
| S7   | References                                                |

### Experimental Procedures

All manipulations were performed in dry gloveboxes filled with inert atmospheres of either N<sub>2</sub> or Ar. All reagents were purchased from commercial sources and used without purification unless otherwise noted. All glassware, stoppers, and magnetic stir bars were dried in an oven at 120 °C for 24 h and transferred into a dry glovebox while hot. Anhydrous acetonitrile, *N,N*-dimethylformamide (DMF), and tetrahydrofuran were purchased, degassed under reduced pressure, and stored over activated molecular sieves (3 Å) inside a dry glovebox prior to use. Isopropylamine was dried by passing through a column of activated molecular sieves (3 Å), then degassed under reduced pressure, and stored over activated molecular sieves (3 Å) at –35 °C in a dry glovebox freezer prior to use. 1,4,7,10,13,16,21,24-Octaazabicyclo[8.8.8]hexacosane (**1**) and 4,7,13,16,21,24-hexamethyl-1,4,7,13,16,21,24-octaazabicyclo[8.8.8]hexacosane (**2**) were synthesized following reported procedures.<sup>S1,S2</sup>

UV–visible spectra were collected using a Jasco V–570 UV/VIS/NIR Spectrophotometer. Samples of Sm**1**I<sub>2</sub>, [Sm**2**]I<sub>2</sub>, and SmI<sub>2</sub> (0.95–1.3 mM) were prepared in an Ar-filled dry glovebox at ambient temperature in acetonitrile or DMF.

Cyclic voltammetry experiments were performed in triplicate with Sm<sup>II</sup>-cryptates (5 mM) in DMF (11 or 22 mL) containing tetraethylammonium perchlorate (30 or 67 mM) as the electrolyte using a Pine Wavenow USB potentiostat and a three electrode system: Ag/AgCl (reference electrode), platinum wire (auxiliary electrode), and glassy carbon (working electrode). The system was kept under an inert atmosphere of Ar. Samples were prepared in a N<sub>2</sub>-filled glovebox, and cyclic voltammograms were obtained in eight segments at a scanning rates of 100 mV s<sup>-1</sup> with an initial potential of –2 V (rising) and upper and lower potentials of 0 and –2 V, respectively.

**Table S1.** Electrochemical potentials of SmI<sub>2</sub>, [Sm**1**]I, and [Sm**2**]I<sub>2</sub>

| Complex                      | Anodic Potential<br>(V vs Ag/AgCl) | Cathodic Potential (V<br>vs Ag/AgCl) | <i>E</i> <sub>1/2</sub> (V vs Ag/AgCl) |
|------------------------------|------------------------------------|--------------------------------------|----------------------------------------|
| SmI <sub>2</sub>             | –1.87                              | –1.29                                | –1.58                                  |
| [Sm <b>1</b> ]I              | –1.47                              | –1.34                                | –1.41                                  |
| [Sm <b>2</b> ]I <sub>2</sub> | –1.77                              | –1.47                                | –1.62                                  |

Elemental analysis (C, H, and N) was performed by Midwest MicroLab in Indianapolis, IN 46250, USA. All values are reported in percentages.

#### Synthesis of [Sm**1**]I

To a chilled (–35 °C), colorless, and stirring solution of **1** (0.130 g, 0.351 mmol) in isopropylamine (0.010 L) in an Ar-filled glovebox was added SmI<sub>2</sub> (0.160 g, 0.396 mmol), and a red-brown precipitate immediately formed. The reaction mixture was allowed to warm at ambient temperature for 3 min before the mother liquor was decanted. The solids were washed with chilled (–35 °C) isopropylamine (2 × 3.0 mL). Residual isopropyl amine was removed under reduced pressure to yield 200 mg (73.5%) of a red–brown fine powder. Anal. Calcd for C<sub>18</sub>H<sub>42</sub>I<sub>2</sub>N<sub>8</sub>Sm: C, 27.91; H, 5.46; N, 14.46. Found: C, 27.35; H, 5.49; N, 14.20.

#### Synthesis of [Sm**2**]I<sub>2</sub>

In a nitrogen-filled glovebox, a yellow solution of **2** (0.113 g, 0.248 mmol) in tetrahydrofuran (7.0 mL) was prepared. A separate dark-blue solution of SmI<sub>2</sub> (90.6 mg, 0.224 mmol) in tetrahydrofuran (0.010 L) was also prepared. The two solutions were mixed, resulting in the immediate precipitation of a green solid. Centrifugation, decanting, washing of the solids with tetrahydrofuran, and removal of residual tetrahydrofuran under reduced pressure yielded

162 mg (84%) of a green powder. Anal. Calcd for  $C_{24}H_{54}I_2N_8Sm$ : C, 33.56; H, 6.34; N, 13.05. Found: C, 33.92; H, 6.31; N, 13.10.

#### X-ray crystallography data for [Sm1]I

A suitable red crystal (0.035 mm × 0.098 mm × 0.10 mm) of [Sm1]I was mounted on a MicroMount (MiTeGen) with polyfluoroether oil (Fomblin YR-1800, Alfa Aesar) on a Bruker D8 Venture diffractometer with kappa geometry, an Incoatec I $\mu$ S micro-focus source X-ray tube (Mo  $K_{\alpha}$  radiation), and a multilayer mirror for monochromatization. The X-ray diffraction intensities were measured using a Photon III CPAD area detector at a distance of 45 mm and 0.5° image width. Data were acquired at 100 K with an Oxford 800 Cryostream low-temperature apparatus. The intensities were integrated using SAINT V8.38a. A multiscan absorption correction was applied with SADABS v2016/2 using APEX4 v2021.10-0. The crystal structure was solved using a dual-space approach as implemented in SHELXT<sup>53</sup> and difference Fourier ( $\Delta F$ ) maps during least-squares refinement, as embedded in SHELXL-2018<sup>54</sup> running under Olex2.<sup>55</sup> All non-hydrogen atoms were refined anisotropically. The hydrogen atoms were positioned with idealized geometry and refined isotropically using a riding model. At 100 K, [Sm1]I was refined in the polar space group  $Pca2_1$  with one metal-ligand complex (coordinating to one iodide) and one iodide counter ion in the asymmetric unit and  $Z=4$ .

**Table S2.** Crystal data and structure refinement of [Sm1]I, CCDC 2162698

|                                             |                                                     |                     |
|---------------------------------------------|-----------------------------------------------------|---------------------|
| Empirical formula                           | $C_{18}H_{42}I_2N_8Sm$                              |                     |
| Formula weight                              | 774.74                                              |                     |
| Temperature                                 | 100 K                                               |                     |
| Crystal system                              | orthorhombic                                        |                     |
| Space group                                 | $Pca2_1$                                            |                     |
| Unit cell dimensions                        | a = 15.7551(9) Å                                    | $\alpha = 90^\circ$ |
|                                             | b = 12.1307(7) Å                                    | $\beta = 90^\circ$  |
|                                             | c = 13.7979(8) Å                                    | $\gamma = 90^\circ$ |
| Volume                                      | 2637.1(3) Å <sup>3</sup>                            |                     |
| Z                                           | 4                                                   |                     |
| Density (calculated)                        | 1.951 g cm <sup>-3</sup>                            |                     |
| Absorption coefficient                      | 4.588 mm <sup>-1</sup>                              |                     |
| F(000)                                      | 1496.0                                              |                     |
| Crystal size                                | 0.1 × 0.098 × 0.035 mm <sup>3</sup>                 |                     |
| Radiation                                   | MoK $\alpha$ ( $\lambda = 0.71073$ )                |                     |
| 2 $\theta$ range for data collection        | 4.238 to 66.474°                                    |                     |
| Index ranges                                | -24 ≤ h ≤ 24, -18 ≤ k ≤ 18, -20 ≤ l ≤ 21            |                     |
| Reflections collected                       | 51941                                               |                     |
| Independent reflections                     | 9830 [ $R_{int} = 0.0832$ , $R_{\sigma} = 0.0682$ ] |                     |
| Data/restraints/parameters                  | 9830/1/262                                          |                     |
| Goodness-of-fit on $F^2$                    | 1.052                                               |                     |
| Final R indexes [ $I \geq 2\sigma(I)$ ]     | $R_1 = 0.0400$ , $wR_2 = 0.0718$                    |                     |
| Final R indexes [all data]                  | $R_1 = 0.0609$ , $wR_2 = 0.0773$                    |                     |
| Largest diff. peak/hole / e Å <sup>-3</sup> | 0.95/-0.98                                          |                     |
| Flack parameter                             | -0.006(15)                                          |                     |

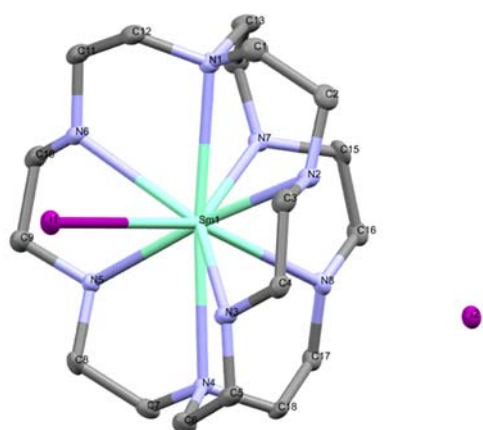

**Figure S1.** X-ray structure of [Sm1]I with displacement ellipsoids drawn at 50% probability. Hydrogen atoms were omitted for clarity.

**Table S3.** Selected Bond Lengths of [Sm1]I.

| Atom | Atom | Length (Å) | Atom | Atom | Length (Å) |
|------|------|------------|------|------|------------|
| Sm1  | I1   | 3.6397(5)  | N7   | C15  | 1.473(9)   |
| Sm1  | N5   | 2.747(8)   | N7   | C14  | 1.467(8)   |
| Sm1  | N4   | 2.934(6)   | C5   | N3   | 1.452(9)   |
| Sm1  | N8   | 2.780(5)   | C5   | C6   | 1.513(10)  |
| Sm1  | N6   | 2.767(6)   | C8   | C7   | 1.517(10)  |
| Sm1  | N7   | 2.710(5)   | C1   | N1   | 1.470(9)   |
| Sm1  | N1   | 2.904(6)   | C1   | C2   | 1.530(10)  |
| Sm1  | N3   | 2.802(6)   | N1   | C13  | 1.496(9)   |
| Sm1  | N2   | 2.782(8)   | N1   | C12  | 1.480(9)   |
| N5   | C8   | 1.485(9)   | N3   | C4   | 1.479(9)   |
| N5   | C9   | 1.465(9)   | C18  | C17  | 1.501(10)  |
| N4   | C18  | 1.476(9)   | C3   | N2   | 1.470(9)   |
| N4   | C6   | 1.479(9)   | C3   | C4   | 1.521(10)  |
| N4   | C7   | 1.480(9)   | C11  | C12  | 1.524(11)  |
| N8   | C17  | 1.464(9)   | C9   | C10  | 1.517(10)  |
| N8   | C16  | 1.468(9)   | N2   | C2   | 1.466(10)  |
| N6   | C11  | 1.454(9)   | C15  | C16  | 1.510(10)  |
| N6   | C10  | 1.468(10)  | C13  | C14  | 1.519(10)  |

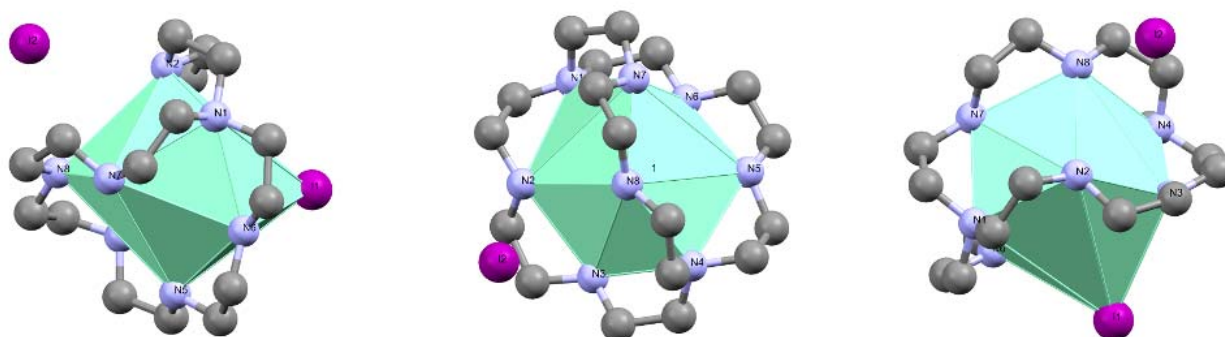

**Figure S2.** Solid state structure of  $[\text{Sm}1]\text{I}$  viewed along the  $a$ ,  $b$ , and  $c$  axes, from left to right.

#### X-ray crystallography data for $[\text{Sm}2]\text{I}_2$

A suitable dark-green crystal (0.13 mm  $\times$  0.20 mm  $\times$  0.42 mm) of  $\text{Sm}2\text{I}_2$  was mounted on a MiTeGen MicroMount with paratone oil on a Bruker X8 APEX-II diffractometer with Mo radiation and a graphite monochromator. X-ray diffractions were measured using a Bruker APEX-II charge-coupled device detector. Data were acquired at 100 K with an Oxford 800 Cryostream low-temperature apparatus. The intensities were integrated using SAINT and a multi-scan absorption correction was applied using SADABS in the APEX3 software package. Using Olex2,<sup>55</sup> the structure was solved by Intrinsic Phasing using the ShelXT structure solution program and refined with the ShelXL refinement package.<sup>53,54</sup> The structure was solved in the space group  $Aea2$ . All nonhydrogen atoms were refined anisotropically. Hydrogen atoms were positioned with idealized geometries and refined isotropically using a riding model.

**Table S4.** Crystal data and structure refinement of  $[\text{Sm}2]\text{I}_2$ , CCDC 2157499

|                                                |                                                               |                     |
|------------------------------------------------|---------------------------------------------------------------|---------------------|
| Empirical formula                              | $\text{C}_{28}\text{H}_{60}\text{I}_2\text{N}_8\text{Sm}$     |                     |
| Formula weight                                 | 941.01                                                        |                     |
| Temperature                                    | 100 K                                                         |                     |
| Crystal system                                 | orthorhombic                                                  |                     |
| Space group                                    | $Aea2$                                                        |                     |
| Unit cell dimensions                           | $a = 19.4034(11) \text{ \AA}$                                 | $\alpha = 90^\circ$ |
|                                                | $b = 18.0204(10) \text{ \AA}$                                 | $\beta = 90^\circ$  |
|                                                | $c = 10.3393(6) \text{ \AA}$                                  | $\gamma = 90^\circ$ |
| Volume                                         | $3615.2(4) \text{ \AA}^3$                                     |                     |
| Z                                              | 4                                                             |                     |
| Density (calculated)                           | $1.729 \text{ g cm}^{-3}$                                     |                     |
| Absorption coefficient                         | $3.365 \text{ mm}^{-1}$                                       |                     |
| $F(000)$                                       | 1864.0                                                        |                     |
| Crystal size                                   | $0.42 \times 0.2 \times 0.13 \text{ mm}^3$                    |                     |
| Radiation                                      | MoK $\alpha$ ( $\lambda = 0.71073$ )                          |                     |
| 2 $\theta$ range for data collection           | 4.198 to 52.898 $^\circ$                                      |                     |
| Index ranges                                   | $-24 \leq h \leq 24, -22 \leq k \leq 20, -12 \leq l \leq 12$  |                     |
| Reflections collected                          | 32079                                                         |                     |
| Independent reflections                        | 3724 [ $R_{\text{int}} = 0.0563, R_{\text{sigma}} = 0.0337$ ] |                     |
| Data/restraints/parameters                     | 3724/1/190                                                    |                     |
| Goodness-of-fit on $F^2$                       | 1.053                                                         |                     |
| Final R indexes [ $I \geq 2\sigma(I)$ ]        | $R_1 = 0.0229, wR_2 = 0.0444$                                 |                     |
| Final R indexes [all data]                     | $R_1 = 0.0294, wR_2 = 0.0463$                                 |                     |
| Largest diff. peak/hole / $e \text{ \AA}^{-3}$ | 0.70/−0.50                                                    |                     |
| Flack parameter                                | 0.004(10)                                                     |                     |

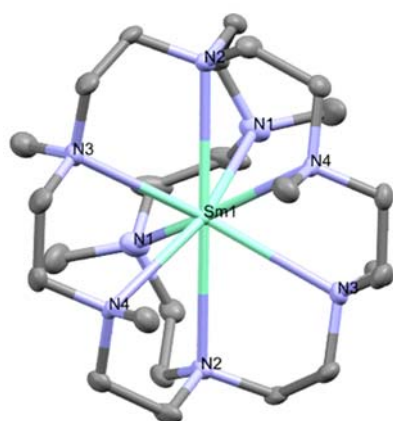

**Figure S3.** X-ray structure of  $[\text{Sm}2]\text{I}_2$  with displacement ellipsoids drawn at 50% probability. Outer-sphere anions and non-coordinating solvent molecules were omitted for clarity.

**Table S5.** Selected Bond Lengths of  $[\text{Sm}2]\text{I}_2$ .

| Atom | Atom            | Length (Å) | Atom | Atom            | Length (Å) |
|------|-----------------|------------|------|-----------------|------------|
| Sm1  | N4              | 2.840(5)   | N2   | C7              | 1.483(6)   |
| Sm1  | N4 <sup>1</sup> | 2.840(5)   | N2   | C6              | 1.476(8)   |
| Sm1  | N1              | 2.859(5)   | N2   | C4              | 1.479(8)   |
| Sm1  | N1 <sup>1</sup> | 2.859(5)   | C7   | C8              | 1.495(9)   |
| Sm1  | N2              | 2.931(4)   | C6   | C5              | 1.502(10)  |
| Sm1  | N2 <sup>1</sup> | 2.931(4)   | N3   | C9              | 1.468(8)   |
| Sm1  | N3 <sup>1</sup> | 2.872(5)   | N3   | C8              | 1.474(8)   |
| Sm1  | N3              | 2.872(5)   | N3   | C10             | 1.459(8)   |
| N4   | C12             | 1.463(8)   | C1S  | C2S             | 1.452(10)  |
| N4   | C11             | 1.473(8)   | N1S  | C2S             | 1.136(8)   |
| N4   | C5 <sup>1</sup> | 1.495(8)   | C3   | C4              | 1.520(9)   |
| N1   | C3              | 1.487(8)   | C11  | C10             | 1.501(9)   |
| N1   | C2              | 1.472(9)   | C1   | C1 <sup>1</sup> | 1.523(16)  |
| N1   | C1              | 1.462(8)   |      |                 |            |

<sup>1</sup>1-X,1-Y,+Z

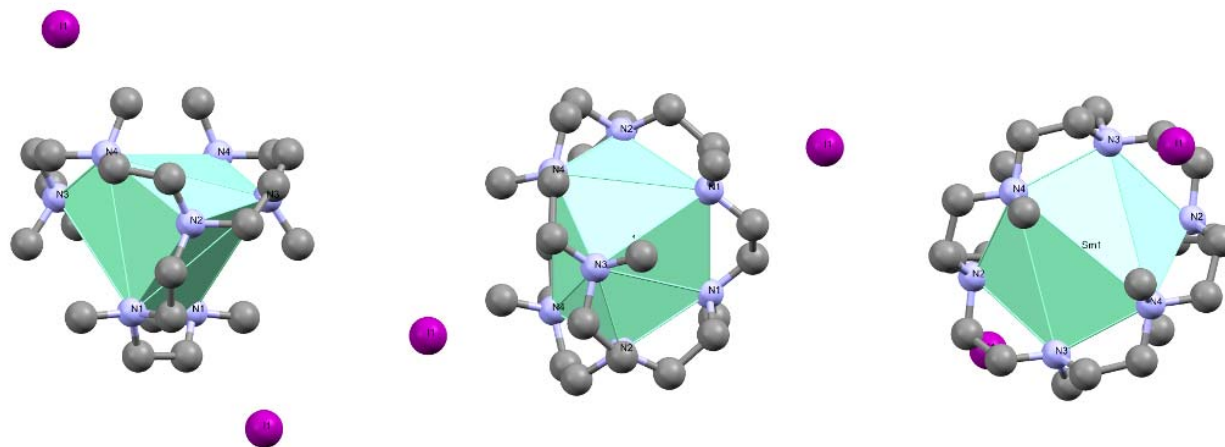

**Figure S4.** Solid state structure of  $[\text{Sm}2]\text{I}_2$  viewed along the a, b, and c axes, from left to right

**Table S5.** Shape analysis of Sm<sup>II</sup> in [Sm1]I

| Shape                                                   | Shape Code | Point Group | CShM     |
|---------------------------------------------------------|------------|-------------|----------|
| Enneagon                                                | EP-9       | $D_{9h}$    | 34.21786 |
| Octagonal pyramid                                       | OPY-9      | $C_{8v}$    | 26.18684 |
| Heptagonal bipyramid                                    | HPY-9      | $D_{7h}$    | 11.84786 |
| Triangular cupola (J3) = trivacant cuboctahedron        | JTC-9      | $C_{3v}$    | 12.95592 |
| Capped cube (Elongated square pyramid, J8)              | JCCU-9     | $C_{4v}$    | 5.09742  |
| Capped cube                                             | CCU-9      | $C_{4v}$    | 2.95595  |
| Capped sq. antiprism (Gyroelongated square pyramid J10) | JCSAPR-9   | $C_{4v}$    | 11.39496 |
| Capped square antiprism                                 | CSAPR-9    | $C_{4v}$    | 10.07381 |
| Tricapped trigonal prism (J51)                          | JTCTPR-9   | $D_{3h}$    | 12.02288 |
| Tricapped trigonal prism                                | TCTPR-9    | $D_{3h}$    | 11.14889 |
| Tridiminished icosahedron (J63)                         | JTDIC-9    | $C_{3v}$    | 10.27630 |
| Hula-hoop                                               | HH-9       | $C_{2v}$    | 4.62337  |
| Muffin                                                  | MFF-9      | $C_s$       | 8.29965  |

CShM values were computed using SHAPE analysis version 2.1.<sup>S6</sup>

**Table S6.** Shape analysis of Sm<sup>II</sup> in [Sm2]I<sub>2</sub>

| Shape                                    | Shape Code | Point Group | CShM     |
|------------------------------------------|------------|-------------|----------|
| Octagon                                  | OP-8       | $D_{8h}$    | 32.16335 |
| Heptagonal pyramid                       | HPY-8      | $C_{7v}$    | 21.47681 |
| Hexagonal bipyramid                      | HPY-8      | $D_{6h}$    | 9.04948  |
| Cube                                     | CU-8       | $O_h$       | 4.33453  |
| Square antiprism                         | SAPR-8     | $D_{4d}$    | 12.46487 |
| Triangular dodecahedron                  | TDD-8      | $D_{2d}$    | 10.07503 |
| Johnson-Gyrobifastigium (J26)            | JGBF-8     | $D_{2h}$    | 14.12007 |
| Johnson-Elongated triangular bipyramid   | JETBPY-8   | $D_{3h}$    | 14.00683 |
| Johnson-Biaugmented trigonal prism (J50) | JBTTPR-8   | $C_{2v}$    | 12.57694 |
| Biaugmented trigonal prism               | BTTPR-8    | $C_{2v}$    | 12.45903 |
| Snub disphenoid (J84)                    | JSD-8      | $D_{2d}$    | 13.47073 |
| Triakis tetrahedron                      | TT-8       | $T_d$       | 5.21177  |
| Elongated trigonal bipyramid             | ETBPY-8    | $D_{3h}$    | 9.99170  |

CShM values were computed using SHAPE analysis version 2.1.<sup>S6</sup>

## References

- S1. M. Y. Redko, R. Huang, J. L. Dye and J. E. Jackson, *Synthesis*, 2006, **5**, 759.
- S2. J. Kim, A. S. Ichimura, R. H. Huang, M. Redko, R. C. Phillips, J. E. Jackson and J. L. Dye, *J. Am. Chem. Soc.*, 1999, **121**, 10666.
- S3. G. M. Sheldrick, *Acta Cryst.*, 2015, **A71**, 3.
- S4. G. M. Sheldrick, *Acta Cryst.*, 2015, **C71**, 3.
- S5. O. V. Dolomanov, L. J. Bourhis, R. J. Gildea, J. A. K. Howard and H. Puschmann, *J. Appl. Cryst.*, 2009, **42**, 339.
- S6. M. Llunell, D. Casanova, J. Cirera, P. Alemany and S. Alvarez, SHAPE, version 2.1, Barcelona, Spain, 2013.
